# Supplementary material for: Civil war and death in Yemen: Analysis of SMART survey and ACLED data, 2012–2019
Source: PLOS journal article supplement (doi:10.1371/journal.pgph.0000581), 2022-08-08
Supplement: S4 (10.1371/journal.pgph.0000581.s004) [file journal.pgph.0000581.s004]

**S3 Table: Association between security level and posterior crude death rate, Yemen, 2015 – 2019.** *One-way ANOVA test to describe the association between four security levels and PCDR as calculated from 91 small-scale cluster surveys. Security levels were determined by generating security scores and insecurity indices. The insecurity indices were then classified into quantiles for analysis.*

|                       | Degrees of freedom | Sum square | Mean Square | P-value |
|-----------------------|--------------------|------------|-------------|---------|
| Security level (n=22) | 3                  | 0.02       | 0.01        | 0.41    |
| Residuals             | 18                 | 0.10       | 0.01        |         |
